# Supplementary material for: Time evolution of the inner structure of antimony phosphate nanosheet suspension developing structural colouration
Source: Royal Society of Chemistry journal article supplement (doi:10.1039/d4sm00647j), 2024-01-01

# Time Evolution of the Inner Structure of Antimony Phosphate Nanosheet Suspension Developing Structural Colouration

Emiko Mouri<sup>a,b</sup>, Takashi Fukumoto<sup>a</sup>, Riki Kato<sup>c</sup>,  
Nobuyoshi Miyamoto<sup>c</sup>, Teruyuki Nakato<sup>a,b</sup>

## Supporting Information

2.5 g L<sup>-1</sup> 5 g L<sup>-1</sup> 10 g L<sup>-1</sup> 20 g L<sup>-1</sup>

As prepared

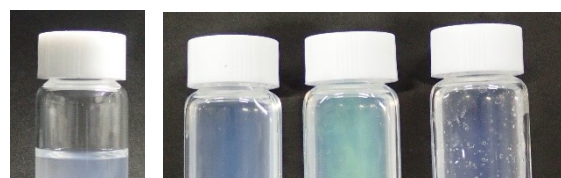

Figure 1S. □ Temporal change of the appearances of  $[\text{Sb}_3\text{P}_2\text{O}_{14}]^{3-}$  nanosheet colloids with different concentrations.

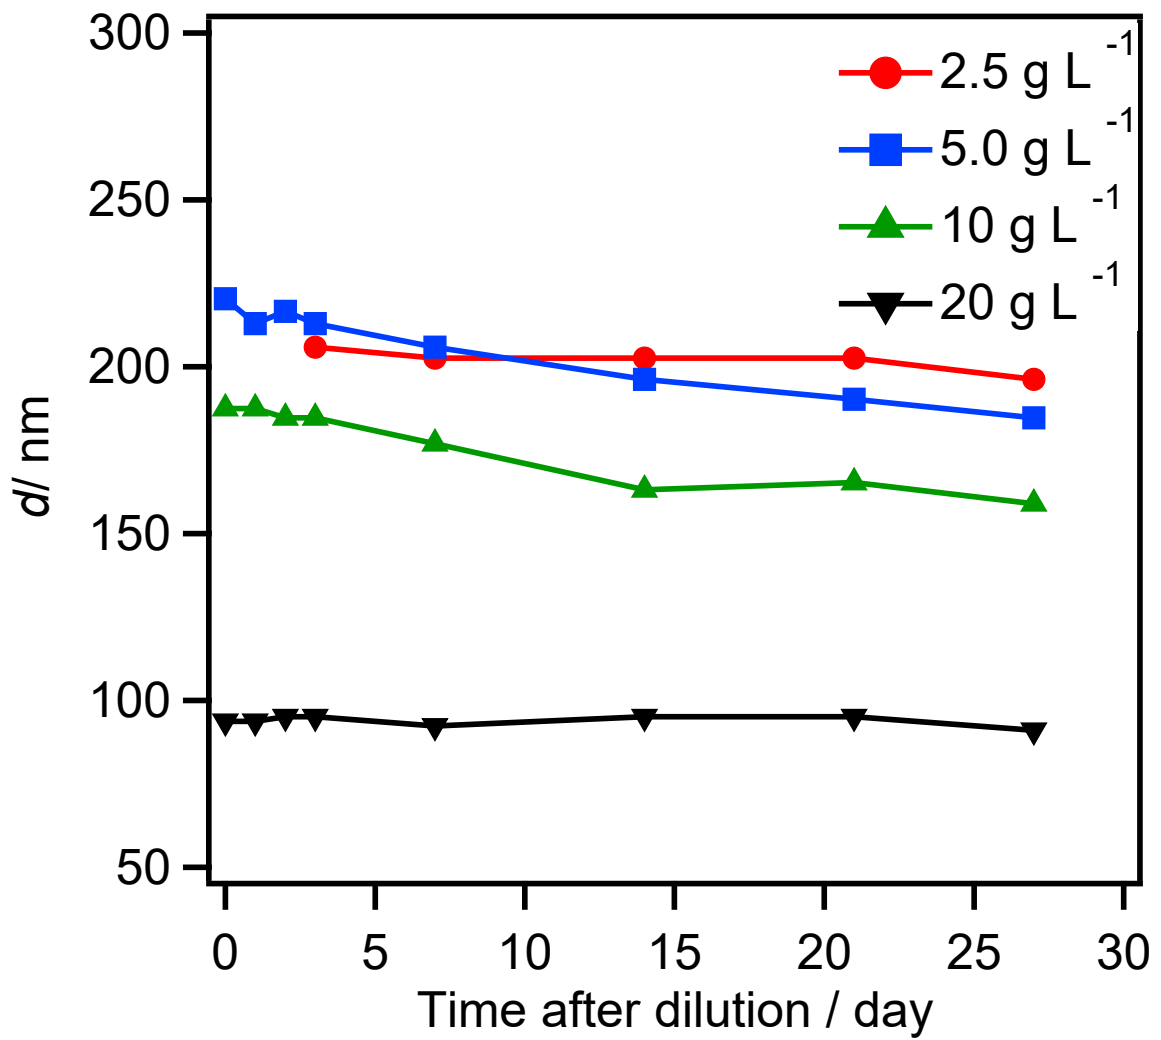

Figure 2S. Temporal change of basal spacing estimated by SAXS.

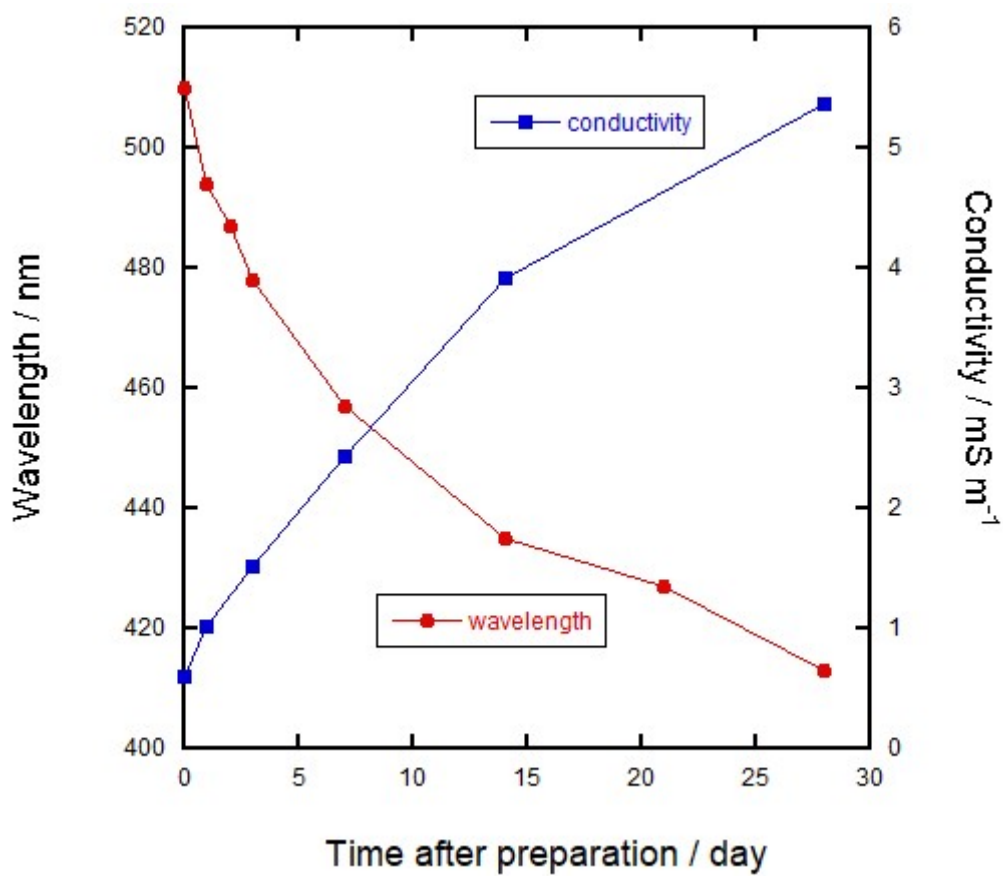

Figure 3S. Time evolution of peak wavelength and electric conductivity for  $[\text{Sb}_3\text{P}_2\text{O}_{14}]^{3-}$  nanosheet colloids. Peak wavelength is from diffused reflective UV-Vis spectra for  $10 \text{ gL}^{-1}$  nanosheet colloid, and electric conductivity are measured for the diluted sample to 1/50.

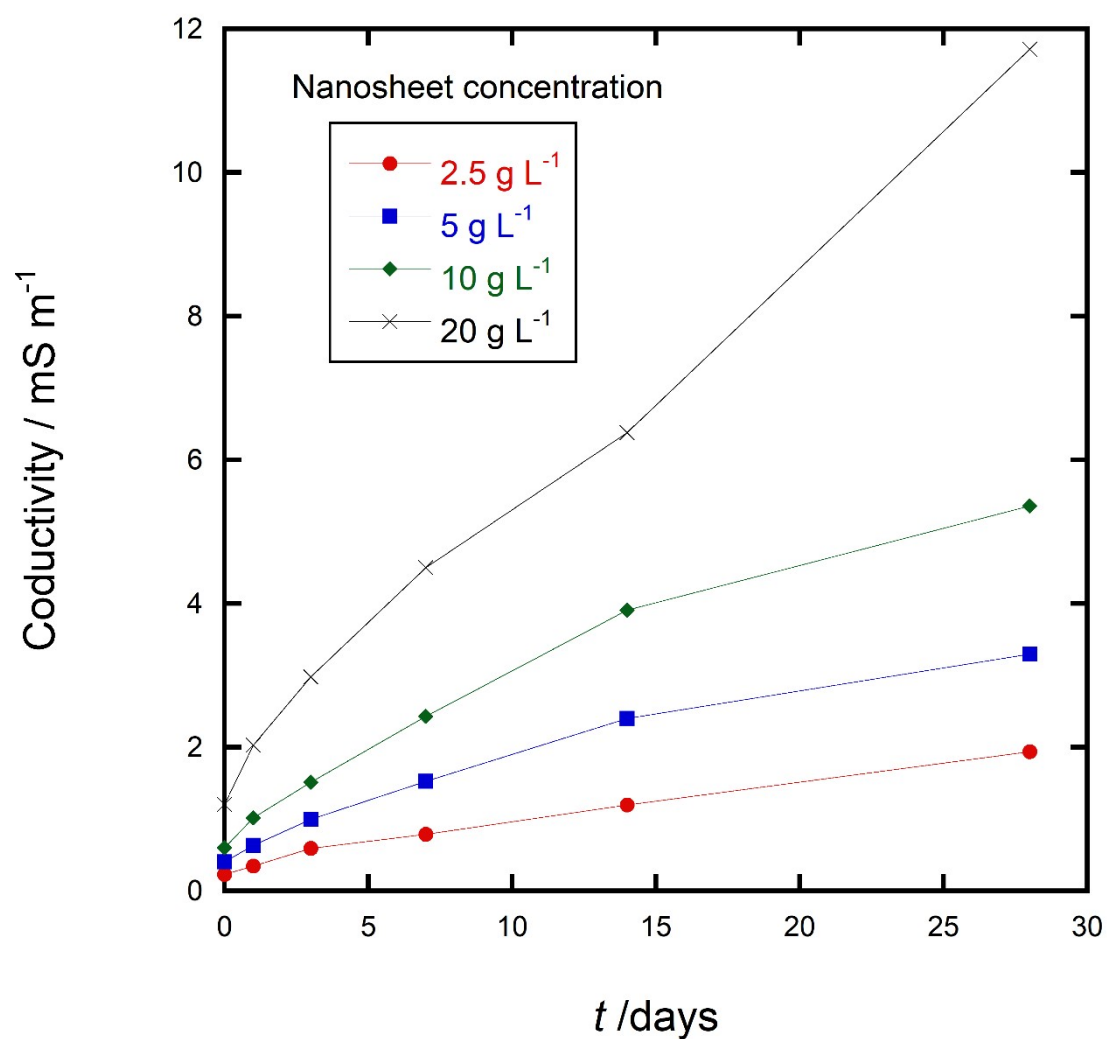

Figure 4S. Time evolution of electric conductivity for antimony phosphate nanosheet colloids. Electric  $[\text{Sb}_3\text{P}_2\text{O}_{14}]^{3-}$  are measured for the diluted sample to 1/50 just after SAXS measurements. The lines are guide to the eyes.

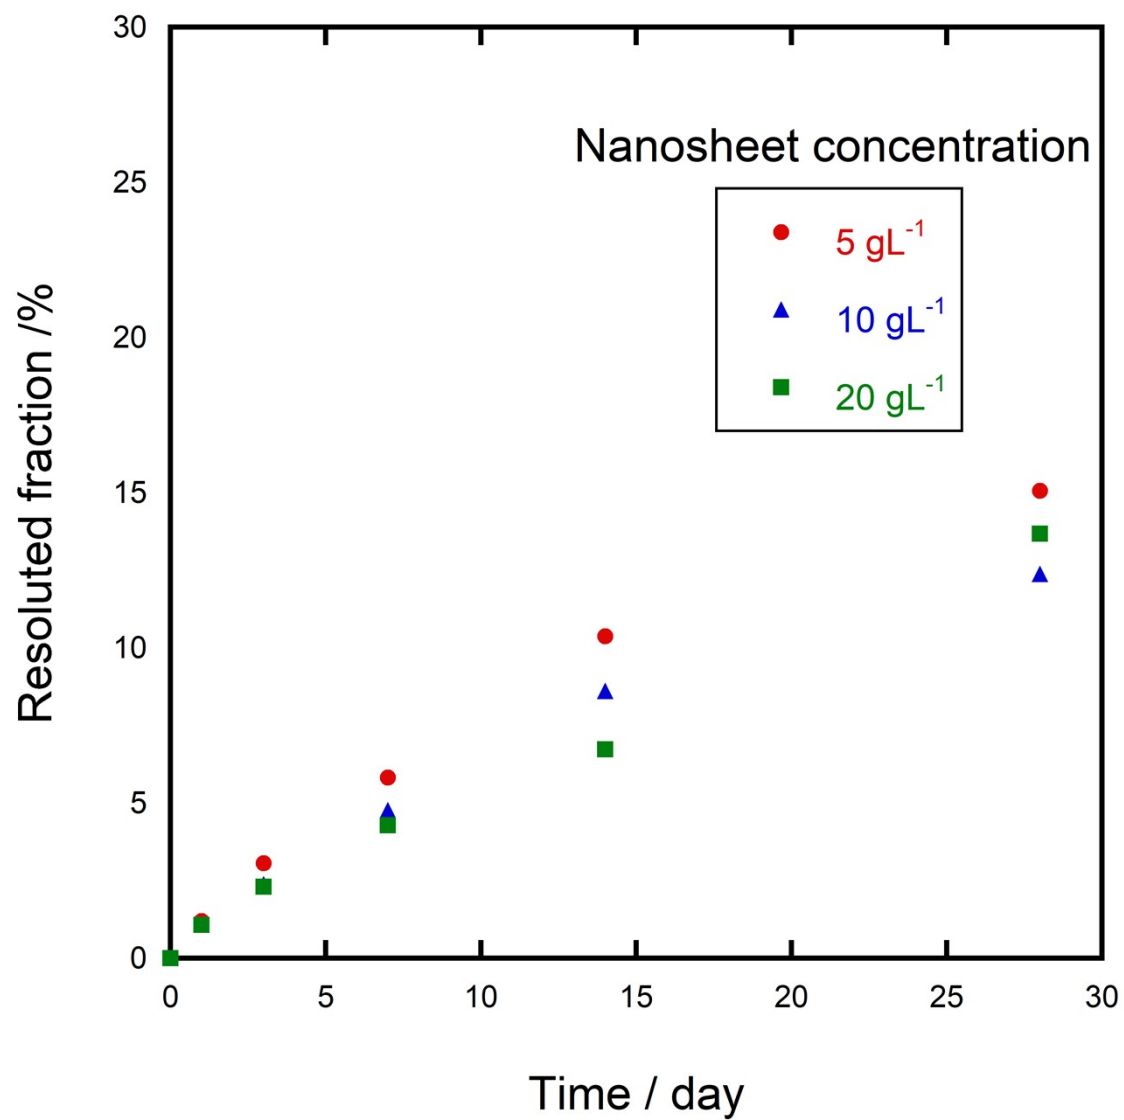

Figure 5S. Time-lapse of resolved fraction of  $[\text{Sb}_3\text{P}_2\text{O}_{14}]^{3-}$  nanosheets. The resolved amounts are estimated based on the values of electric conductivities with some assumptions described in the main text.

NaCl  $10^{-3}$  M

5 g L<sup>-1</sup>

10 g L<sup>-1</sup>

20 g L<sup>-1</sup>

As prepared

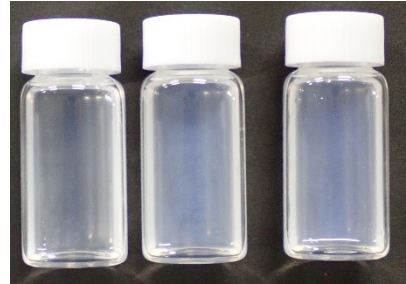

7 days

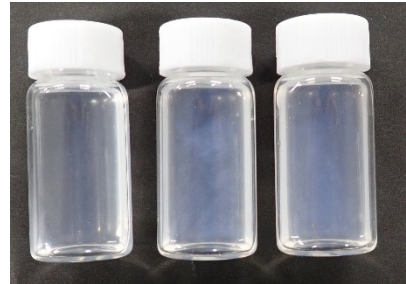

14 days

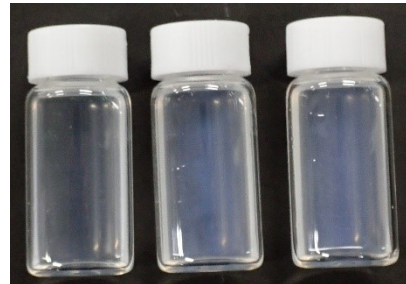

21 days

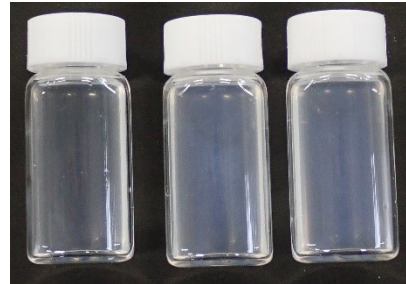

NaCl  $10^{-2}$  M

5 g L<sup>-1</sup>

10 g L<sup>-1</sup>

20 g L<sup>-1</sup>

28 days

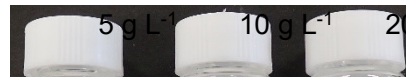

As prepared

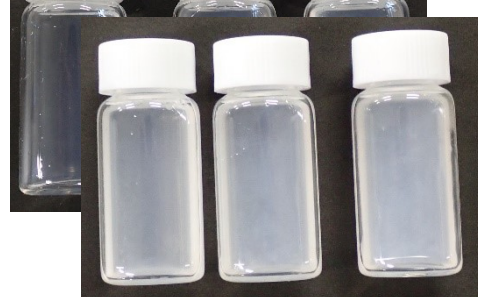

7 days

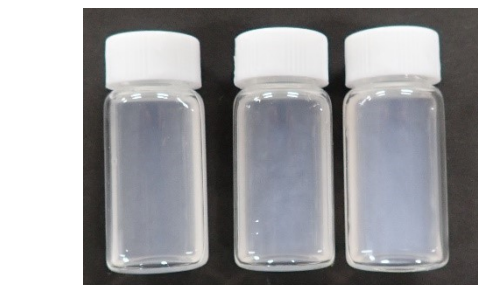

Figure 6S. Temporal change appearances of  $[\text{Sb}_3\text{P}_2\text{O}_{14}]^{3-}$  nanosheet colloids different  $[\text{Sb}_3\text{P}_2\text{O}_{14}]^{3-}$  nanosheet concentrations and NaCl concentrations.

of the  
with  
 $10^{-3}\text{M}$

Figure 7S. Temporal change of the appearances of  $[\text{Sb}_3\text{P}_2\text{O}_{14}]^{3-}$  nanosheet colloids with different  $[\text{Sb}_3\text{P}_2\text{O}_{14}]^{3-}$  nanosheet concentrations and  $10^{-2}\text{M}$  NaCl concentrations.



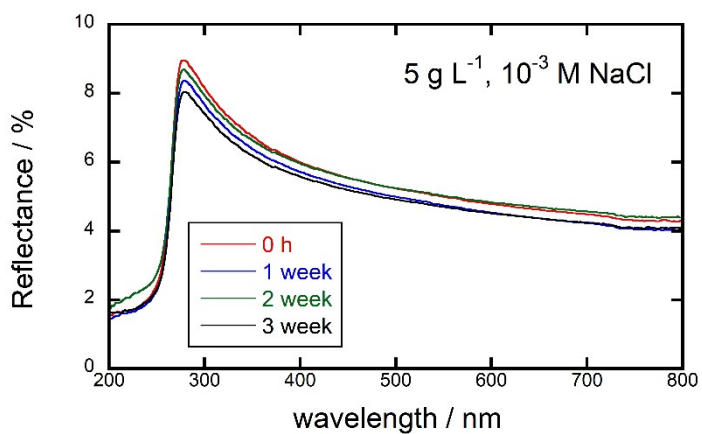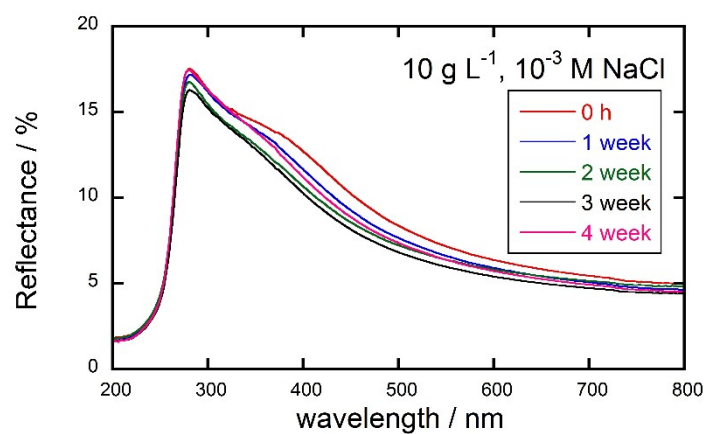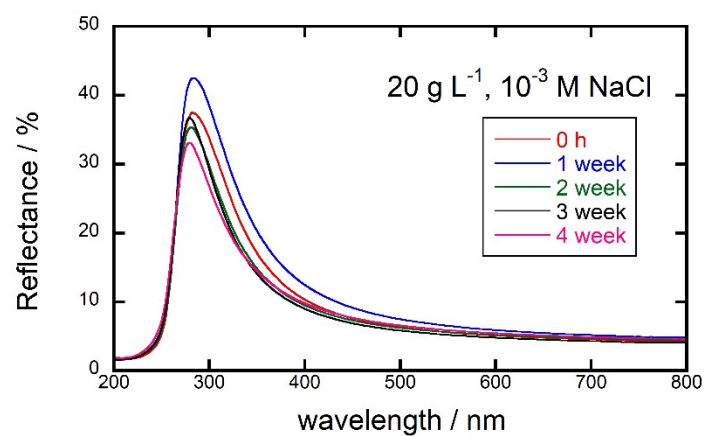

Figure 8S. Diffused reflective UV-Vis spectra of [Sb<sub>3</sub>P<sub>2</sub>O<sub>14</sub>]<sup>3-</sup> nanosheet colloids with different [Sb<sub>3</sub>P<sub>2</sub>O<sub>14</sub>]<sup>3-</sup> nanosheet concentrations in 10<sup>-3</sup> M NaCl solution.

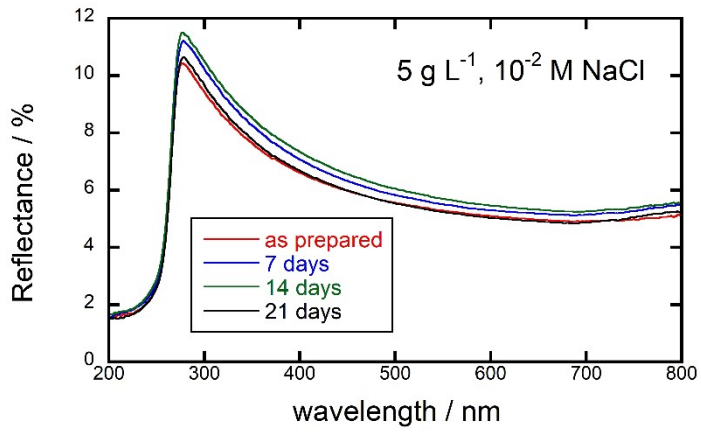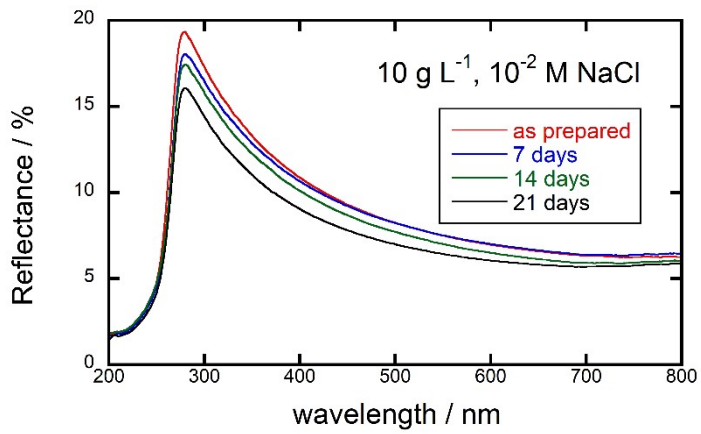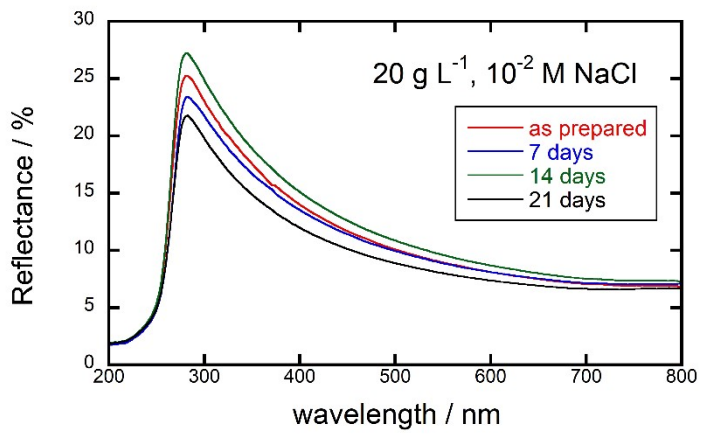

Figure 9S. Diffused reflective UV-Vis spectra of  $[\text{Sb}_3\text{P}_2\text{O}_{14}]^{3-}$  nanosheet colloids with different  $[\text{Sb}_3\text{P}_2\text{O}_{14}]^{3-}$  nanosheet concentrations in  $10^{-2}$  M NaCl solution.

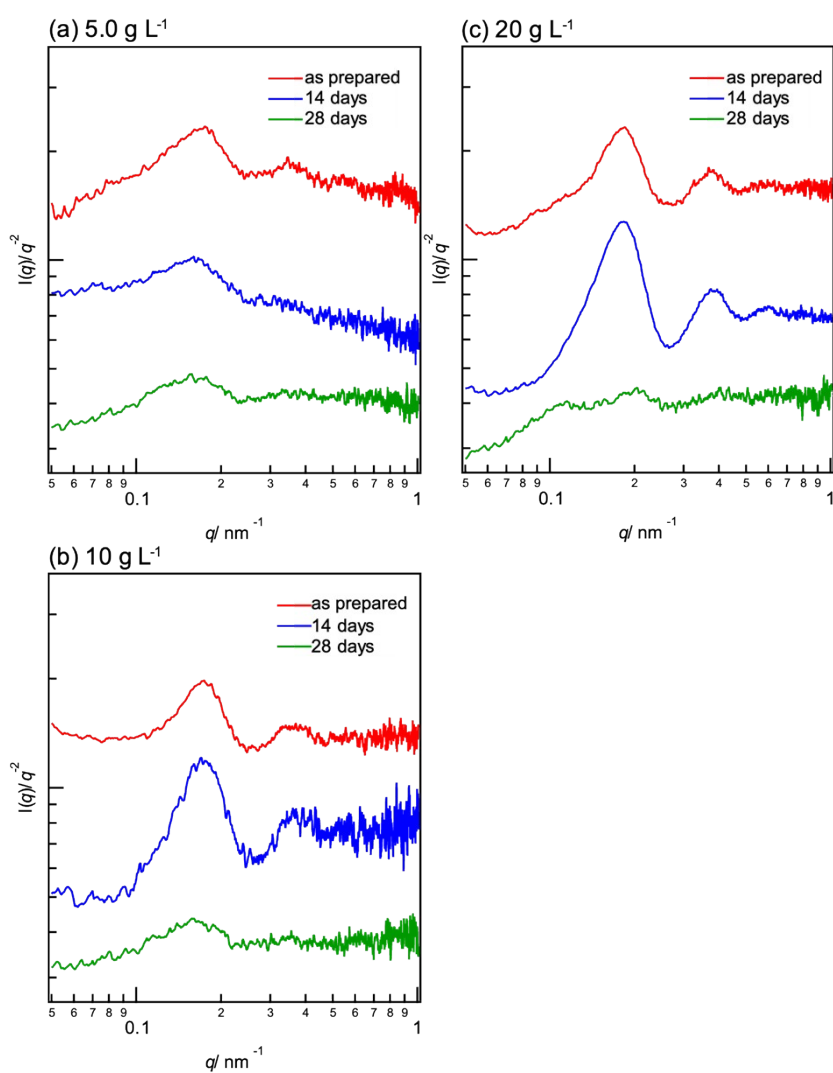

Figure 10S. Time course of SAXS profiles of  $[\text{Sb}_3\text{P}_2\text{O}_{14}]^{3-}$  nanosheet colloids with  $10^{-2}$  mol L<sup>-1</sup> NaCl at constant nanosheet concentrations (a) 5 g L<sup>-1</sup>, (b) 10 g L<sup>-1</sup>, (c) 20 g L<sup>-1</sup>.

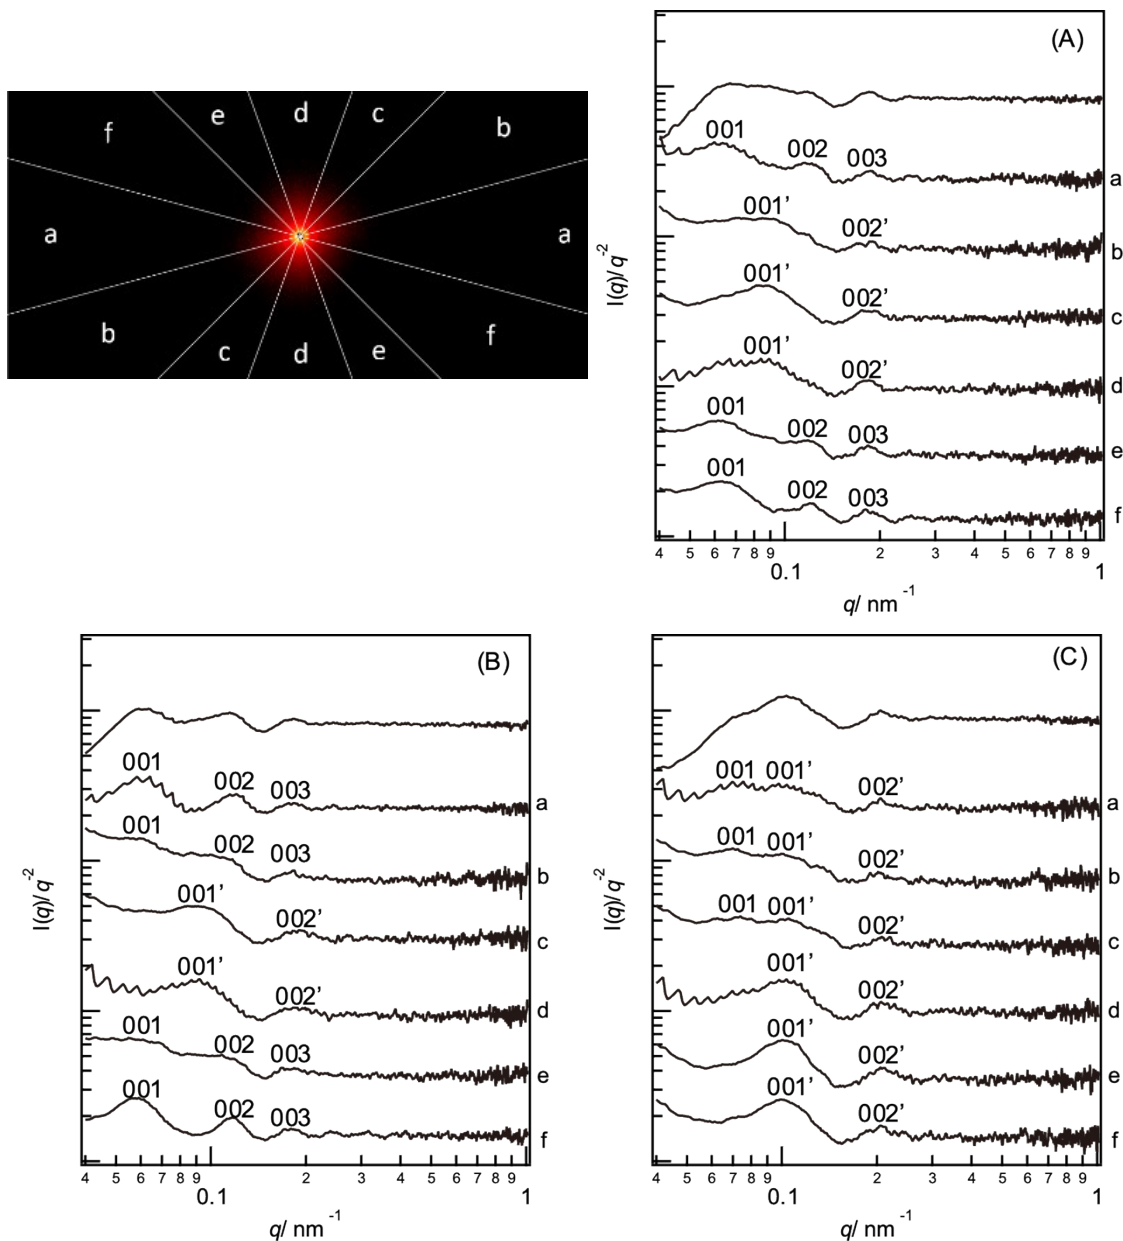

Figure 11S. Angular divided SAXS profiles for  $20 \text{ g L}^{-1}$   $[\text{Sb}_3\text{P}_2\text{O}_{14}]^{3-}$  colloids with  $10^{-3} \text{ mol L}^{-1}$  NaCl concentrations at different time periods (A) as prepared, (B) 14 days, and (C) 28 days accumulated in the specific section assigned in the 2D scattering pattern (*a-f*).

2D scattering pattern is divided into 12 parts with 30 degree in central angle. The divided parts are paired by diagonal angle position and labelled from *a* to *f*. The SAXS profiles at the top for each graph is torus integrated profile, which is commonly-presented form and also presented in Fig. 9S. The other six profiles under torus integrated profile is the profiles extracted from each area labelled from *a-f* in 2D scattering pattern.

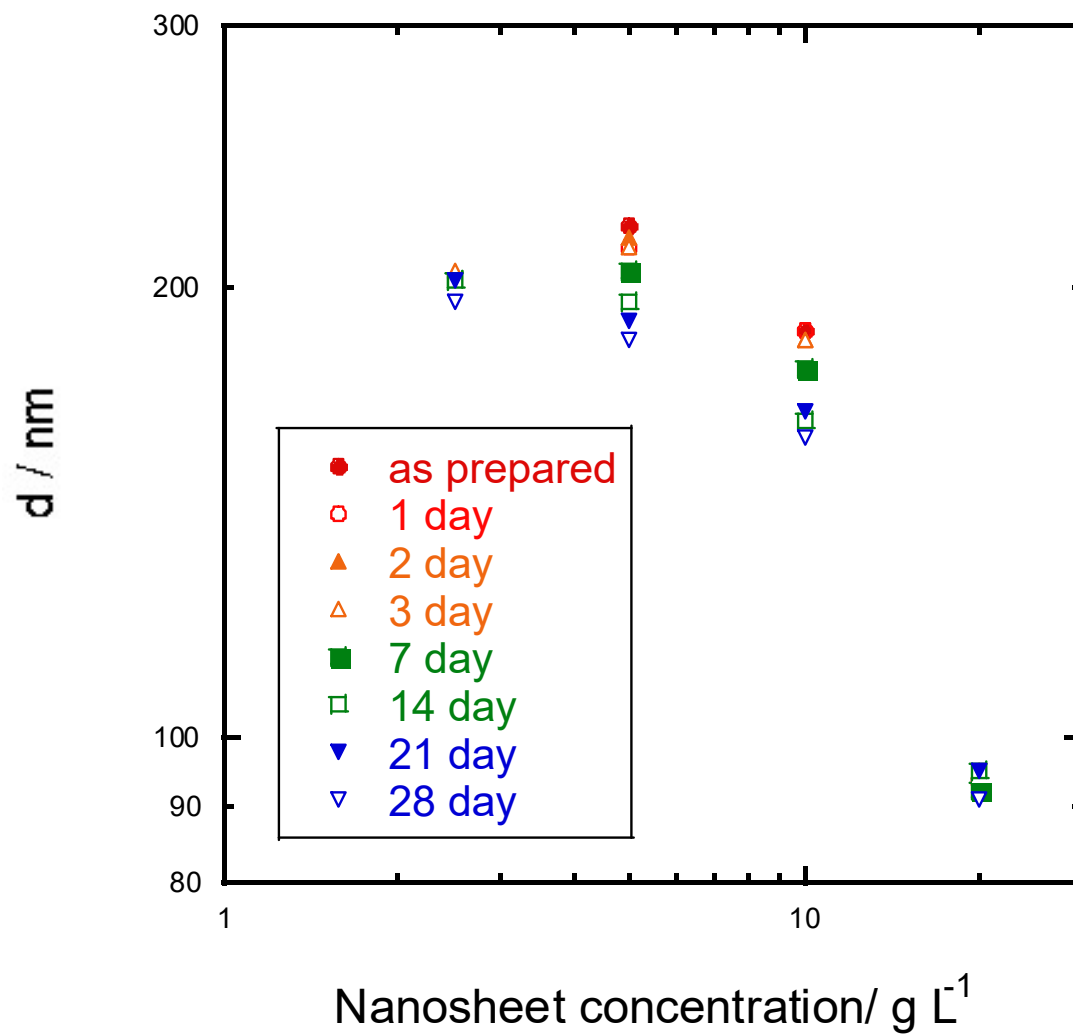

Figure 12S. Time evolution of basal spacing variations with  $[\text{Sb}_3\text{P}_2\text{O}_{14}]^{3-}$  nanosheet concentration in logarithmic values.

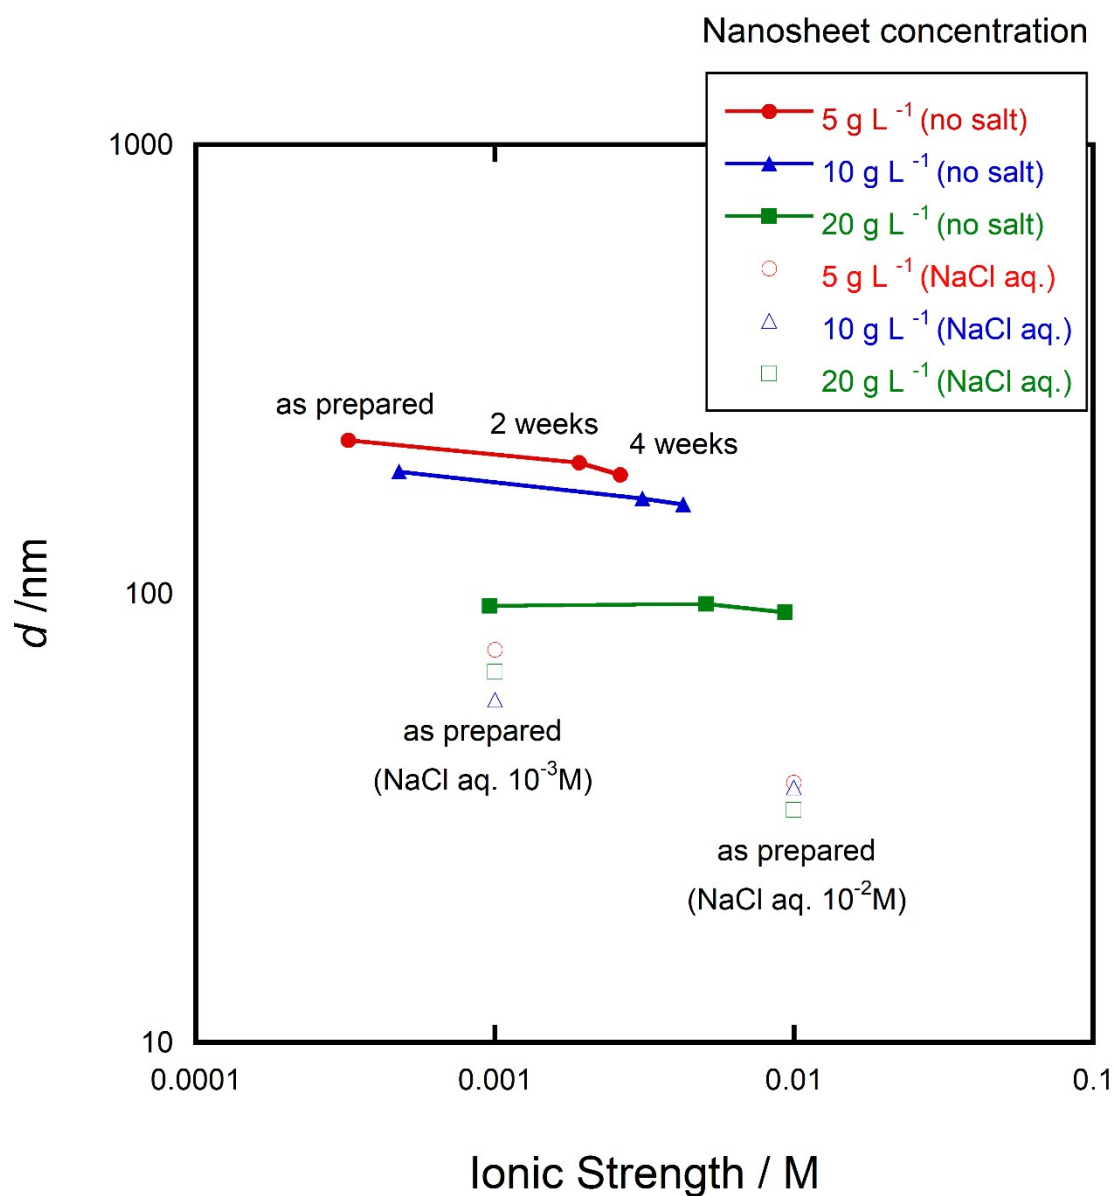

Figure 13S. Basal spacings plotted against ionic strength. The values of ionic strength in aqueous system is estimated from the electric conductivities of 1/50 diluted samples with some assumptions described in the main text.

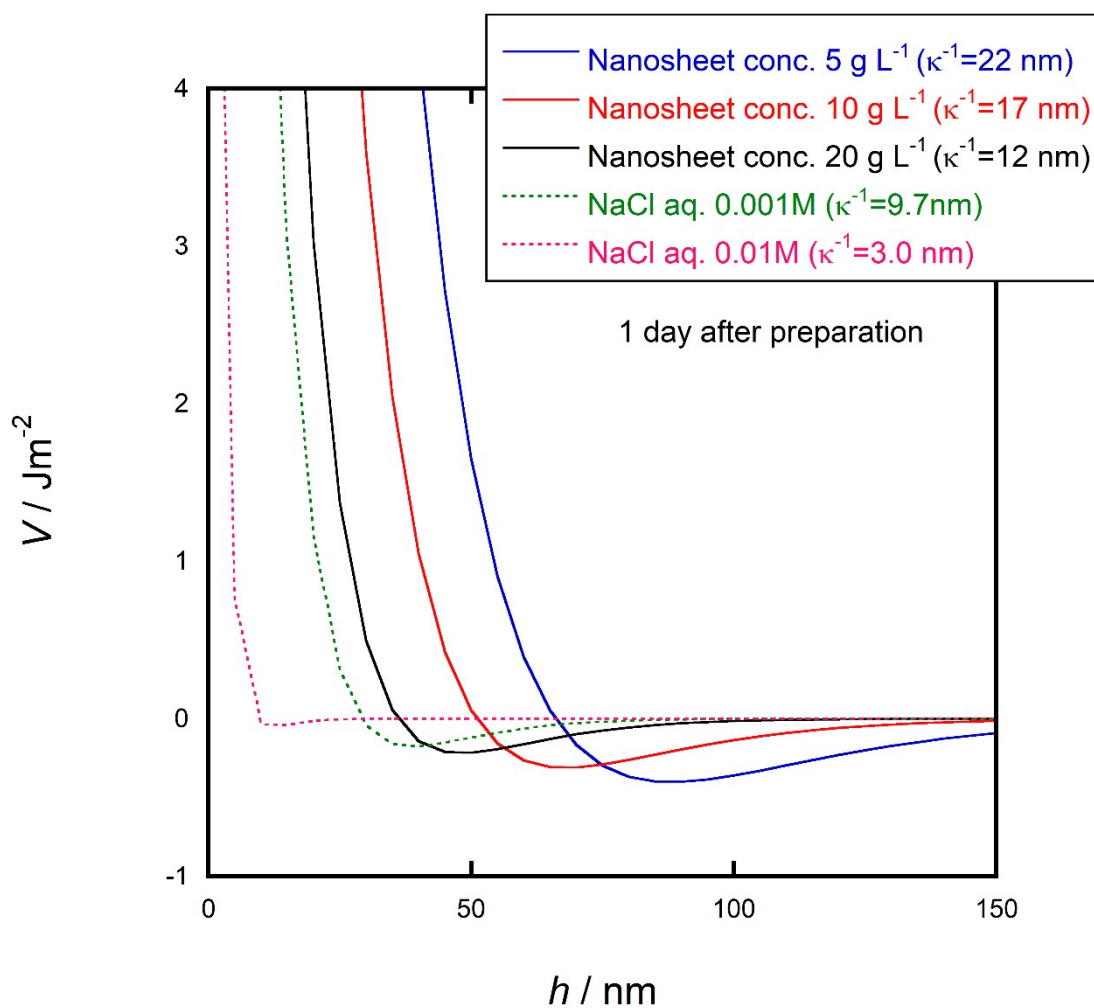

Figure 14S. Simulated potential curves based on Ise-Sogami theory for  $[\text{Sb}_3\text{P}_2\text{O}_{14}]^{3-}$  nanosheet systems at various Debye lengths ( $\kappa^{-1}$ ). The values of estimated ionic strength from electric conductivity measurements are introduced in the simulation. The simulated distances at minimum potential is much shorter than the basal spacings experimentally obtained.



Table 1S Sample appearances between the crossed polarizers.

| Time                                                                                                                                                  | As prepared | 7 day | 14 day | 21 day | 28 day |
|-------------------------------------------------------------------------------------------------------------------------------------------------------|-------------|-------|--------|--------|--------|
| 5 g L <sup>-1</sup><br>[Sb <sub>3</sub> P <sub>2</sub> O <sub>14</sub> ] <sup>3-</sup><br>nanosheet<br>colloids<br><br>Without salt                   |             |       |        |        |        |
| 5 g L <sup>-1</sup><br>[Sb <sub>3</sub> P <sub>2</sub> O <sub>14</sub> ] <sup>3-</sup><br>nanosheet<br>colloids<br><br>10 <sup>-3</sup> M<br>NaCl aq. |             |       |        |        |        |
| 5 g L <sup>-1</sup><br>[Sb <sub>3</sub> P <sub>2</sub> O <sub>14</sub> ] <sup>3-</sup><br>nanosheet<br>colloids<br><br>10 <sup>-2</sup> M<br>NaCl aq. |             |       |        |        |        |
| 10 g L <sup>-1</sup><br>[Sb <sub>3</sub> P <sub>2</sub> O <sub>14</sub> ] <sup>3-</sup><br>nanosheet<br>colloids<br><br>Without salt                  |             |       |        |        |        |

10 g L<sup>-1</sup>  
[Sb<sub>3</sub>P<sub>2</sub>O<sub>14</sub>]<sup>3-</sup>  
nanosheet  
colloids

10<sup>-3</sup>M  
NaCl aq.

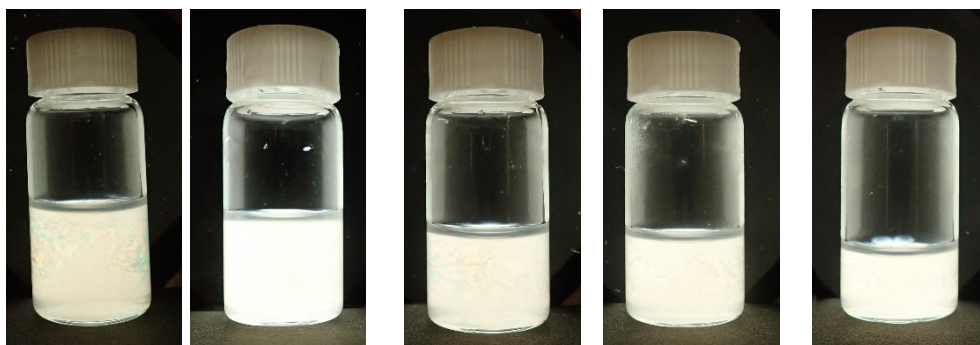

10 g L<sup>-1</sup>  
[Sb<sub>3</sub>P<sub>2</sub>O<sub>14</sub>]<sup>3-</sup>  
nanosheet  
colloids

10<sup>-2</sup>M  
NaCl aq.

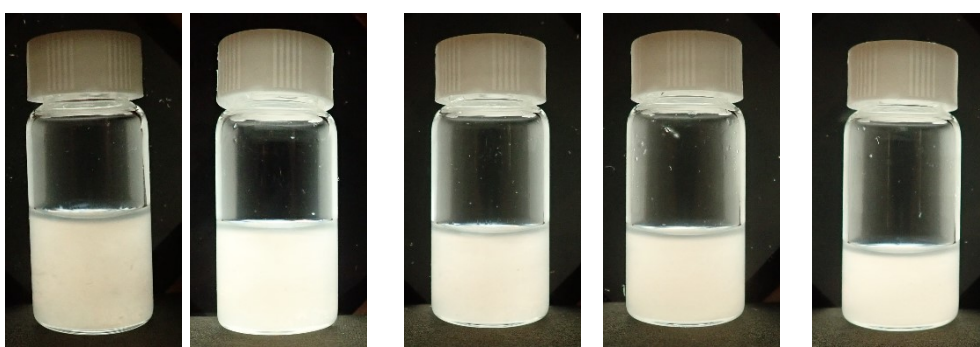

20 g L<sup>-1</sup>  
[Sb<sub>3</sub>P<sub>2</sub>O<sub>14</sub>]<sup>3-</sup>  
nanosheet  
colloids

Without salt

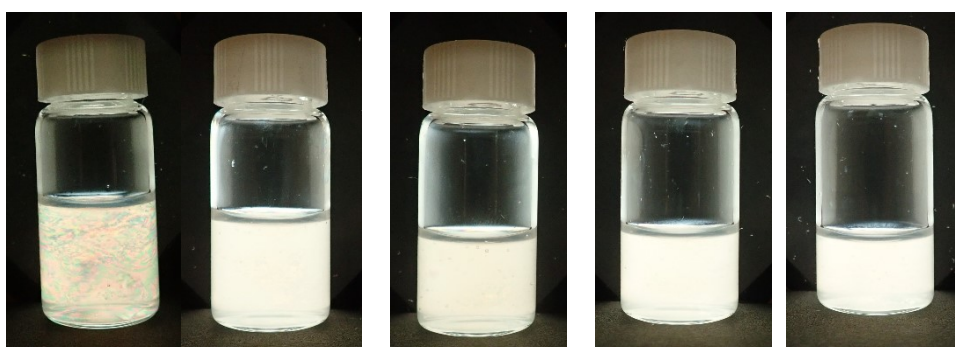

20 g L<sup>-1</sup>  
[Sb<sub>3</sub>P<sub>2</sub>O<sub>14</sub>]<sup>3-</sup>  
nanosheet  
colloids

10<sup>-3</sup>M  
NaCl aq.

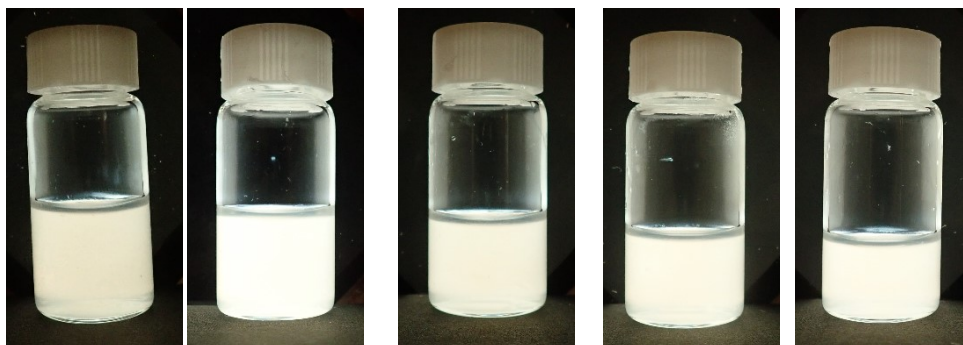

20 g L<sup>-1</sup>  
[Sb<sub>3</sub>P<sub>2</sub>O<sub>14</sub>]<sup>3-</sup>  
nanosheet  
colloids

10<sup>-2</sup>M  
NaCl aq.

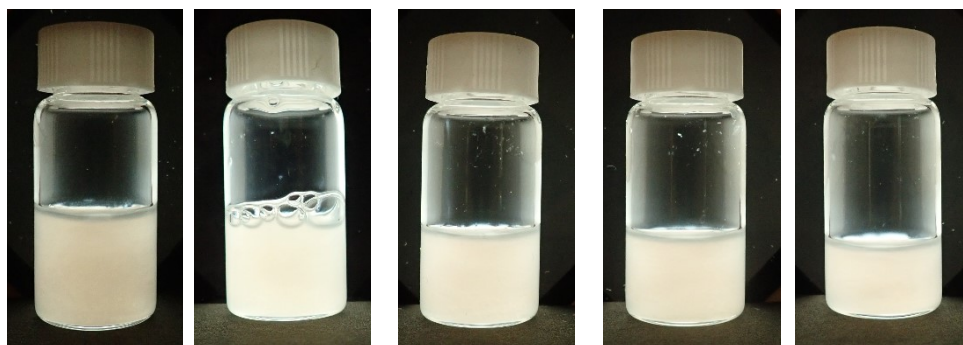

Supplement: d4sm00647j1.pdf [file d4sm00647j1.pdf]
